# Supplementary material for: Bioaccessibility and antioxidant capacity of epigallocatechin gallate interacting with mung bean protein: impact of protein structure
Source: Royal Society of Chemistry journal article supplement (doi:10.1039/d5fo00758e), 2025-01-01
Supplement: d5fo00758e1.pdf [file d5fo00758e1.pdf]

## **Supplementary Information**

**Bioaccessibility and Antioxidant capacity of Epigallocatechin Gallate interacted  
with mung bean protein: Impact of protein structure**

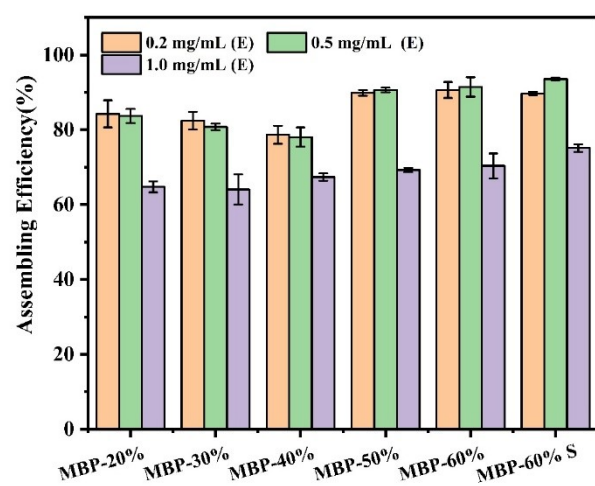

**Fig. S1** The assembling efficiency of EGCG in MBP.

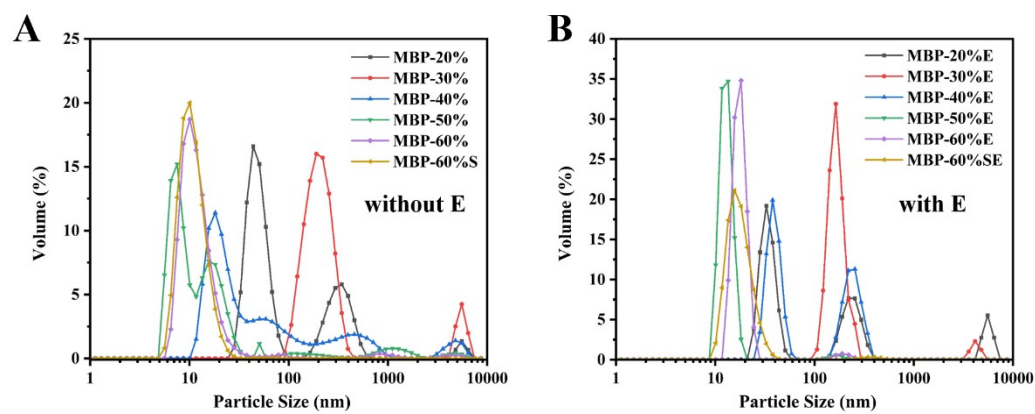

**Fig. S2** The volume distribution diagrams of MBP (A) and MBP-EGCG (B) complexes.

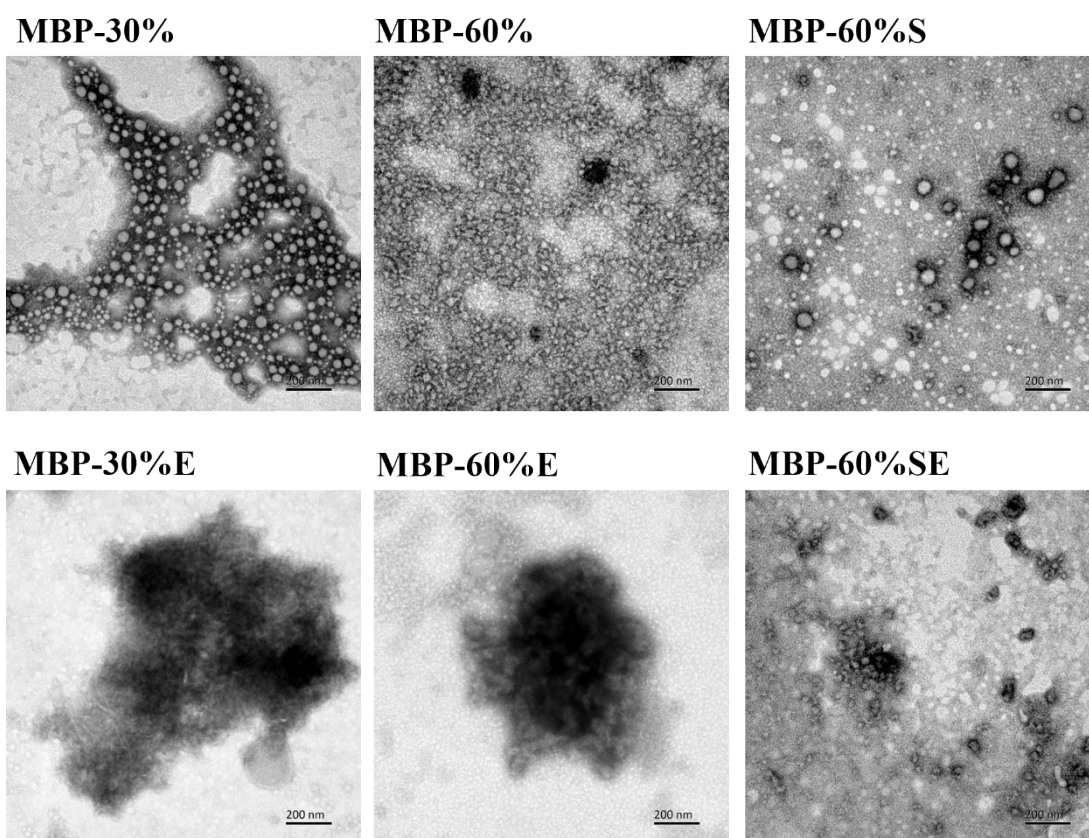

**Fig. S3** TEM images of MBP and MBP-EGCG complexes
